# Supplementary material
Source: PubMed Central journal article supplement (PMC3281733)
Supplement: supp_C111.328559_jbc.C111.328559-1.pdf [file supp_C111.328559_jbc.C111.328559-1.pdf]

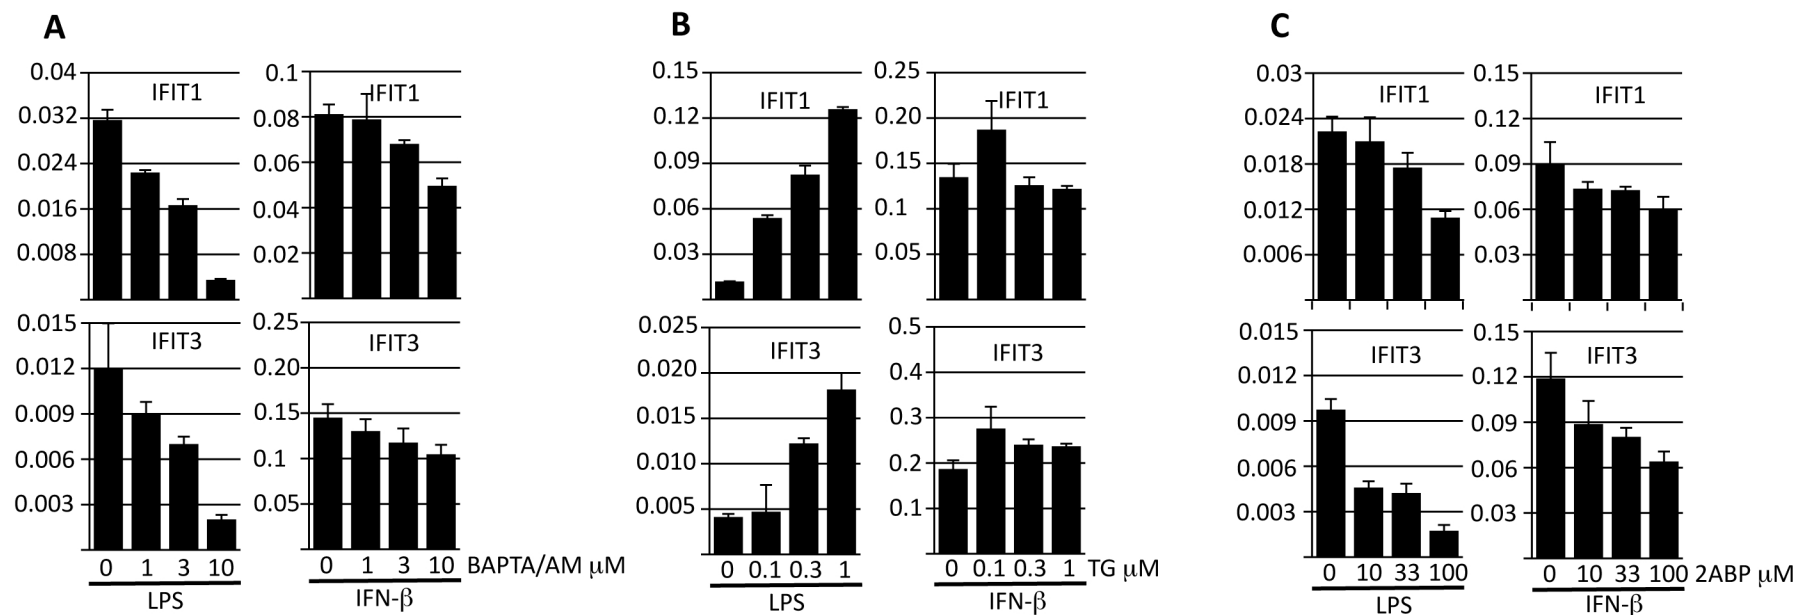

**SUPPL. FIGURE 1.** RAW264.7 cells were pretreated with **A)** BAPTA/AM **B)** Thapsigargin or **C)** 2-ABP for 30 minutes and then stimulated with LPS (100 ng/ml) or IFN-β (100 IU/ml) for 4 h. IFIT1 and IFIT3 expression were analyzed by RT-QPCR and normalized to GAPDH. Results are presented as relative expression normalized to GAPDH and are means of three independent experiments.
