# Supplementary material
Source: PubMed Central journal article supplement (PMC3281733)
Supplement: supp_C111.328559_jbc.C111.328559-2.pdf [file supp_C111.328559_jbc.C111.328559-2.pdf]

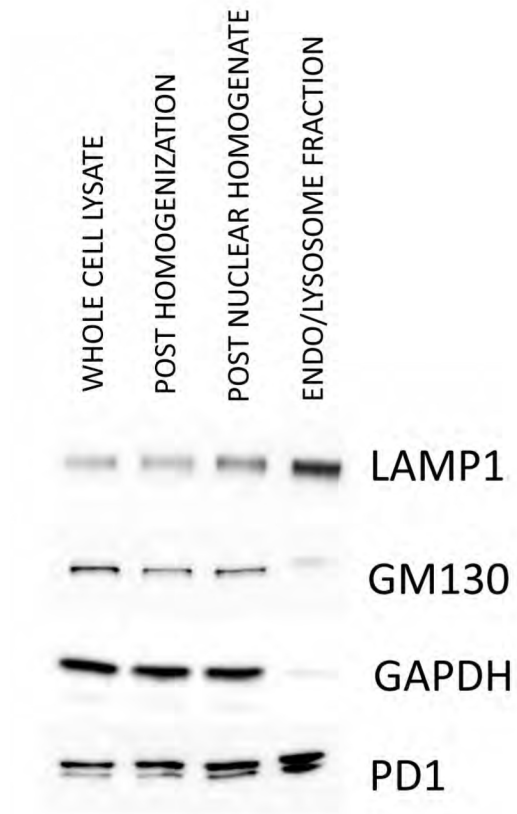

**SUPPL. FIGURE 2.** 20  $\mu$ g RAW264.7 cell lysates from different enrichment steps were analysed for the presence of LAMP1 (endo/lysosome), GM130 (Golgi), GAPDH (cytosol) and PD1 (ER).
